# Supplementary material for: Where Are Socioeconomically Deprived Immigrants Located in Chile? A Spatial Analysis of Census Data Using an Index of Multiple Deprivation from the Last Three Decades (1992-2012)
Source: PLOS journal article supplement (doi:10.1371/journal.pone.0146047), 2016-01-12
Supplement: S2 (10.1371/journal.pone.0146047.s002) [file journal.pone.0146047.s002]

**ORD. N° 8.866**

**ANT.:** Requirement AH007W-0009615 dated 28.11.2013.

**MAT.:** Notification about reproduction costs

Santiago, November 28th 2013

Mrs  
Andrea Vásquez González.  
Membrillar S/N.  
**La Florida.**

Dear Mrs Vásquez:

We are pleasant to express our regards to you and to tell you that the information asked by you in the request Number AH007W-0009615 is available in the format and support defined by you.

Nevertheless and in order to the Law Number 20.285, Article number 18<sup>th</sup> about access to public information, we inform that for giving the information to you is necessary a payment of \$900 (USD 1,5). This payment will include the reproduction cost of the following information: Databases for 1992 and 2002 Censuses in SPSS and REDATAM software, and the Digital Urban Cartography of 1992 and 2002 censuses in Shapefile format. This reproduction cost regarding public information has been defined by our institution according the Exempt Resolution Number 3.050, dated October 7<sup>th</sup>, 2013.

The aforementioned payment should be done in the National Institute of Statistics, located at Paseo Bulnes N° 418, Piso 1, Sub-Department of Civic Information, schedule for citizen attention: Monday-Friday from 09:00 to 14:00 in Santiago.

Considering the previous information, we inform that you will have 30 weekdays for paying the reproduction cost. Despite we encourage you to confirm the acceptance of this requirement to the following e-mail address: [transparencia@ine.cl](mailto:transparencia@ine.cl), in order to collect all the information asked by you in the supporting media (DVD) by our staff.

In case you cannot cover the reproduction costs established by the legal basis applied to public information, you can access to this information providing your own device to storage your required information. In that case, the reproduction costs will be free of charge. The only requirement for getting the information through this way is to make an appointment with the Sub-department of city information.

Once expired the legal period applicable to this Service for giving you the required information, or in case of denied access to the information, you have the right to ask to the Council of Transparency about protection to your right of accessing to public information according what Law 20.285, article Number 24 say about the Access to the Public Information.

Sincerely yours,

**National Institute of Statistics**
